# Supplementary material for: Plant-derived angiogenin fusion protein’s cytoprotective effect on trabecular meshwork damage induced by Benzalkonium chloride in mice
Source: PeerJ journal article supplement (doi:10.7717/peerj.9084), 2020-05-22
Supplement: Figure_S1.pdf [file Figure_S1.pdf]

Protocol 1: Mouse model of BAK-induced TM degeneration (n=4-5 per group)

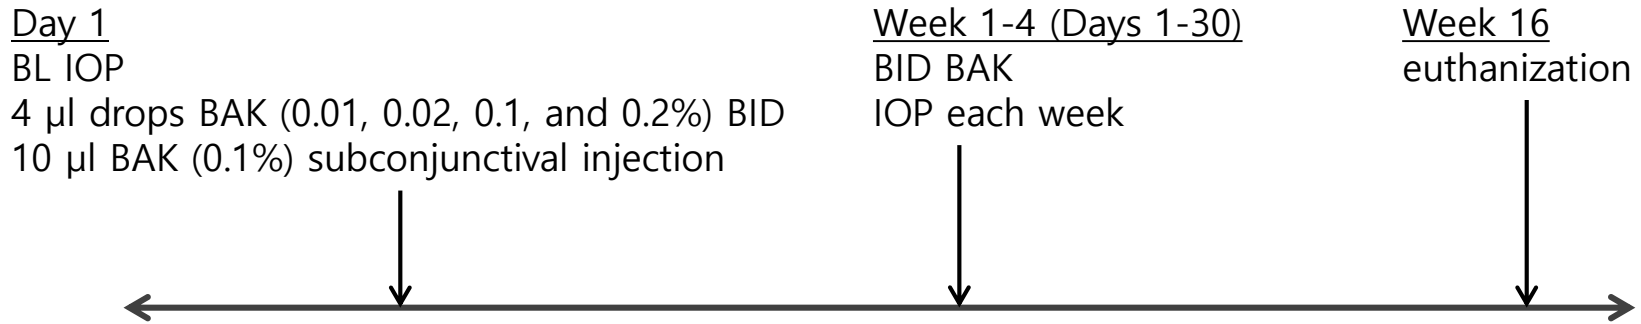

Protocol 2: Treatment of ANG on experimental mouse model (n=9 per group)

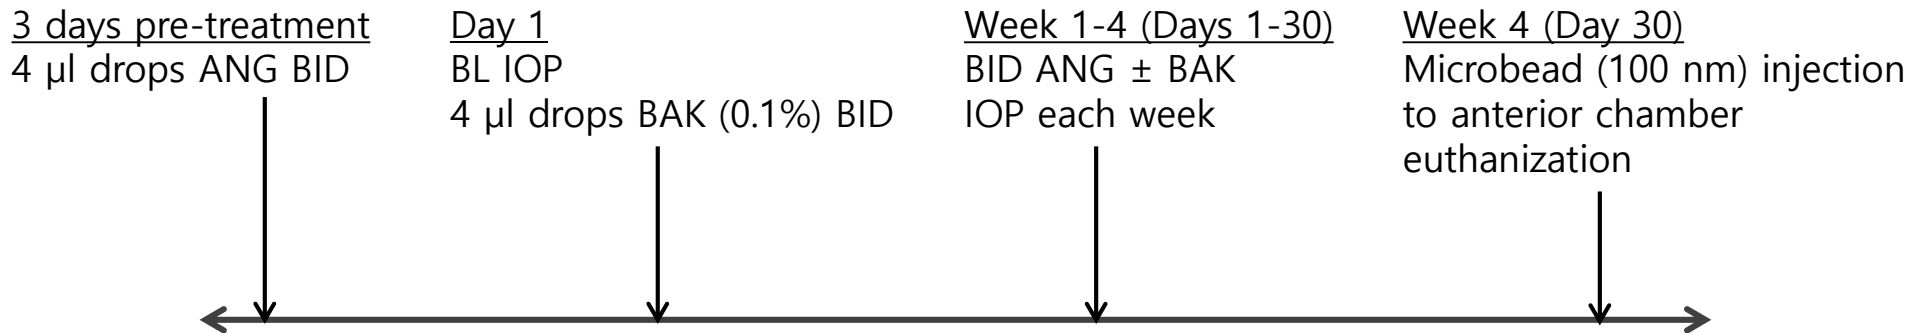

ANG=Angiogenin

BID=Twice Daily

IOP=Intraocular pressure

BAK=Benzalkonium Chloride

BL=Baseline

TM=Trabecular Meshwork
