# Supplementary material for: Plant-derived angiogenin fusion protein’s cytoprotective effect on trabecular meshwork damage induced by Benzalkonium chloride in mice
Source: PeerJ. 2020 May 22;8:e9084. doi: 10.7717/peerj.9084 (PMC7247531; doi:10.7717/peerj.9084)
Supplement: Supplemental Information 3 [file peerj-08-9084-s003.xlsx]

## Sheet: Sheet1
					2015-09-01				2015-09-02				2015-09-03				2015-09-04				2015-09-05				2015-09-06				2015-09-07				2015-09-08				2015-09-09				2015-09-10				2015-09-16				2015-09-23
		1	2	3	Baseline	1	2	3	POD#1	1	2	3	POD#2	1	2	3	POD#3	1	2	3	POD#4	1	2	3	POD#5	1	2	3	POD#6	1	2	3	POD#7	1	2	3	POD#8/1	1	2	3	POD#9/2	1	2	3	POD#17/8	1	2	3	POD#24/15
1	R	8	7	7	7.33333	10	11	10	10.3333	8	9	9	8.66667	10	10	11	10.3333	11	11	10	10.6667	12	11	11	11.3333	11	12	8	10.3333	14	16	20	16.6667	15	14	10	13	9	10	9	9.33333	13	14	16	14.3333	13	13	11	12.3333
2	R	9	10	10	9.66667	10	11	10	10.3333	10	12	9	10.3333	13	14	13	13.3333	13	11	10	11.3333	10	10	11	10.3333	10	12	10	10.6667	15	16	14	15	10	10	10	10	10	11	11	10.6667	13	14	9	12	12	14	10	12
3	R	10	10	10	10	14	13	11	12.6667	14	12	10	12	18	12	17	15.6667	12	11	13	12	10	10	9	9.66667	10	10	9	9.66667	14	18	19	17	12	10	15	12.3333	12	11	11	11.3333	10	16	18	14.6667	16	14	14	14.6667
4	R	10	10	12	10.6667	10	10	13	11	10	9	10	9.66667	15	14	11	13.3333	14	12	12	12.6667	12	14	10	12	12	12	10	11.3333	10	16	13	13	14	10	10	11.3333	13	12	11	12	9	10	9	9.33333	15	18	16	16.3333
5	R	14	17	14	15	9	11	10	10	13	12	14	13	15	18	17	16.6667	12	12	13	12.3333	11	11	10	10.6667	11	11	11	11	15	14	15	14.6667	14	9	9	10.6667	10	10	9	9.66667	12	12	16	13.3333	11	14	13	12.6667
									#DIV/0!				#DIV/0!				#DIV/0!				#DIV/0!				#DIV/0!				#DIV/0!				#DIV/0!				#DIV/0!				#DIV/0!				#DIV/0!				#DIV/0!
1	L	10	9	9	9.33333	10	10	10	10	10	10	10	10	10	11	10	10.3333	10	13	10	11	10	11	10	10.3333	11	11	12	11.3333	17	13	15	15	13	13	10	12	7	6	6	6.33333	9	10	12	10.3333	8	9	12	9.66667
2	L	10	10	10	10	14	10	13	12.3333	10	9	10	9.66667	10	11	10	10.3333	10	9	9	9.33333	12	14	10	12	13	12	12	12.3333	14	13	11	12.6667	17	20	17	18	10	9	9	9.33333	10	10	12	10.6667	8	9	10	9
3	L	10	8	9	9	9	8	10	9	10	11	11	10.6667	12	10	10	10.6667	11	12	14	12.3333	12	13	12	12.3333	10	11	11	10.6667	15	16	14	15	9	8	7	8	12	11	11	11.3333	10	9	9	9.33333	9	10	15	11.3333
4	L	10	10	15	11.6667	9	9	10	9.33333	9	9	9	9	10	12	9	10.3333	10	11	10	10.3333	10	11	11	10.6667	10	10	12	10.6667	8	9	10	9	8	8	7	7.66667	10	9	10	9.66667	15	9	9	11	12	10	11	11
5	L	15	11	10	12	12	10	10	10.6667	10	10	9	9.66667	12	13	13	12.6667	10	12	12	11.3333	14	12	12	12.6667	15	13	12	13.3333	13	13	12	12.6667	7	9	9	8.33333	9	10	12	10.3333	10	11	14	11.6667	10	10	10	10
									#DIV/0!				#DIV/0!				#DIV/0!				#DIV/0!				#DIV/0!				#DIV/0!				#DIV/0!				#DIV/0!				#DIV/0!				#DIV/0!				#DIV/0!
6	R	10	9	9	9.33333	11	10	11	10.6667	11	10	13	11.3333	15	13	16	14.6667	15	14	15	14.6667	13	10	10	11	10	9	10	9.66667	10	10	11	10.3333	19	14	19	17.3333	16	13	19	16	20	21	23	21.3333	18	15	22	18.3333
7	R	14	9	8	10.3333	8	8	9	8.33333	11	9	10	10	16	13	13	14	13	14	12	13	11	10	11	10.6667	11	13	10	11.3333	11	13	15	13	16	14	19	16.3333	10	9	8	9	13	16	12	13.6667	16	17	16	16.3333
8	R	11	10	12	11	12	16	16	14.6667	8	11	11	10	14	12	14	13.3333	11	13	13	12.3333	11	11	12	11.3333	12	10	10	10.6667	12	11	13	12	16	18	18	17.3333	10	11	8	9.66667	11	13	18	14	16	18	15	16.3333
9	R	7	8	10	8.33333	14	11	11	12	11	10	10	10.3333	15	11	10	12	13	17	17	15.6667	12	15	12	13	13	13	12	12.6667	11	10	10	10.3333	16	14	12	14	14	13	19	15.3333	15	18	15	16	16	15	18	16.3333
10	R	18	14	10	14	15	13	16	14.6667	14	13	11	12.6667	13	12	15	13.3333	14	14	10	12.6667	10	9	10	9.66667	10	10	11	10.3333	12	12	12	12	11	14	10	11.6667	12	11	10	11	12	12	13	12.3333	11	10	10	10.3333
									#DIV/0!				#DIV/0!				#DIV/0!				#DIV/0!				#DIV/0!				#DIV/0!				#DIV/0!				#DIV/0!				#DIV/0!				#DIV/0!				#DIV/0!
6	L	11	10	9	10	12	10	9	10.3333	13	12	11	12	10	9	10	9.66667	10	8	9	9	10	11	10	10.3333	11	11	13	11.6667	9	9	9	9	17	14	17	16	13	13	13	13	10	15	10	11.6667	16	14	11	13.6667
7	L	9	10	10	9.66667	10	15	11	12	12	13	13	12.6667	12	10	11	11	16	15	17	16	10	15	12	12.3333	12	11	13	12	10	12	13	11.6667	10	16	16	14	13	12	12	12.3333	10	12	16	12.6667	10	9	9	9.33333
8	L	12	16	19	15.6667	11	14	15	13.3333	10	12	10	10.6667	10	11	11	10.6667	14	13	13	13.3333	12	13	10	11.6667	12	12	10	11.3333	11	10	8	9.66667	14	14	17	15	9	9	8	8.66667	10	15	10	11.6667	10	13	9	10.6667
9	L	8	9	10	9	13	11	14	12.6667	10	10	11	10.3333	10	10	10	10	10	8	12	10	12	12	10	11.3333	15	15	17	15.6667	10	9	9	9.33333	11	14	10	11.6667	9	8	8	8.33333	10	10	12	10.6667	15	13	10	12.6667
10	L	15	18	12	15	14	11	11	12	10	10	9	9.66667	10	12	11	11	9	10	10	9.66667	10	10	11	10.3333	10	15	11	12	10	13	12	11.6667	10	10	10	10	10	10	10	10	9	7	9	8.33333	13	13	11	12.3333
									#DIV/0!				#DIV/0!				#DIV/0!				#DIV/0!				#DIV/0!				#DIV/0!				#DIV/0!				#DIV/0!				#DIV/0!				#DIV/0!				#DIV/0!
11	R	11	14	12	12.3333	10	10	9	9.66667	10	8	8	8.66667	13	11	10	11.3333	20	19	17	18.6667	13	10	10	11	10	10	10	10	16	12	11	13	14	13	15	14	15	9	8	10.6667	20	19	15	18	17	20	16	17.6667
12	R	12	10	13	11.6667	12	10	9	10.3333	15	10	10	11.6667	17	14	16	15.6667	16	14	13	14.3333	11	11	12	11.3333	10	11	10	10.3333	12	10	10	10.6667	16	13	15	14.6667	15	14	14	14.3333	15	10	13	12.6667	17	21	18	18.6667
13	R	10	14	11	11.6667	8	9	10	9	9	8	12	9.66667	10	11	10	10.3333	14	14	13	13.6667	11	13	11	11.6667	12	10	10	10.6667	16	16	16	16	14	12	17	14.3333	17	21	19	19	20	15	16	17	18	21	24	21
14	R	13	10	11	11.3333	14	13	15	14	13	16	13	14	16	20	15	17	12	10	12	11.3333	12	11	13	12	11	10	10	10.3333	17	17	14	16	18	17	17	17.3333	20	18	16	18	33	36	34	34.3333	17	18	14	16.3333
15	R	10	9	9	9.33333	14	14	13	13.6667	14	14	9	12.3333	12	10	9	10.3333	10	10	10	10	10	11	15	12	10	9	13	10.6667	18	16	14	16	18	16	14	16	11	12	17	13.3333	16	17	11	14.6667	17	20	21	19.3333
									#DIV/0!				#DIV/0!				#DIV/0!				#DIV/0!				#DIV/0!				#DIV/0!				#DIV/0!				#DIV/0!				#DIV/0!				#DIV/0!				#DIV/0!
11	L	10	13	10	11	13	12	10	11.6667	9	9	7	8.33333	10	10	10	10	13	13	12	12.6667	12	12	14	12.6667	12	11	10	11	9	10	10	9.66667	15	13	11	13	10	13	10	11	10	10	15	11.6667	9	13	10	10.6667
12	L	10	14	14	12.6667	13	13	11	12.3333	10	11	10	10.3333	10	8	10	9.33333	11	11	13	11.6667	14	10	12	12	13	15	12	13.3333	13	12	14	13	15	17	11	14.3333	8	10	8	8.66667	16	15	12	14.3333	10	9	8	9
13	L	11	15	13	13	13	12	13	12.6667	10	10	10	10	9	10	12	10.3333	10	12	10	10.6667	11	11	11	11	15	10	11	12	9	10	10	9.66667	10	10	10	10	13	15	14	14	12	10	14	12	11	10	9	10
14	L	10	11	13	11.3333	10	10	12	10.6667	9	10	10	9.66667	10	9	9	9.33333	10	10	11	10.3333	13	12	10	11.6667	12	11	11	11.3333	10	9	10	9.66667	13	16	10	13	11	13	12	12	10	10	10	10	8	9	8	8.33333
15	L	11	10	10	10.3333	13	13	13	13	11	10	10	10.3333	14	13	11	12.6667	11	15	12	12.6667	15	13	12	13.3333	10	12	12	11.3333	14	16	18	16	11	16	10	12.3333	11	11	13	11.6667	15	14	10	13	14	13	11	12.6667
[truncated: 37 more columns]

## Sheet: Sheet2
	2015-09-01	2015-09-02	2015-09-03	2015-09-04	2015-09-05	2015-09-06	2015-09-07	2015-09-08	2015-09-09	2015-09-10	2015-09-16	2015-09-23	2015-09-30	2015-10-06	2015-10-13	2015-10-21	2015-10-28	2015-11-11	2015-11-25	2015-12-09	2015-12-23
	Baseline	POD#1	POD#2	POD#3	POD#4	POD#5	POD#6	POD#7	POD#8/1	POD#9/2	POD#17/8	POD#24/15	POD#31/22	POD#37/28	POD#44/35	POD#52/43	POD#59/50	POD#73/64	POD#87/78	POD#101/92	POD#115/106
1	7.33333	10.3333	8.66667	10.3333	10.6667	11.3333	10.3333	16.6667	13	9.33333	14.3333	12.3333
2	9.66667	10.3333	10.3333	13.3333	11.3333	10.3333	10.6667	15	10	10.6667	12	12	13	12.6667	11	17.6667	16.6667	26	11	16.3333	17
3	10	12.6667	12	15.6667	12	9.66667	9.66667	17	12.3333	11.3333	14.6667	14.6667	13.3333	17.6667	14.3333	18.3333	17.6667	19.6667	21.6667	17	14.3333
4	10.6667	11	9.66667	13.3333	12.6667	12	11.3333	13	11.3333	12	9.33333	16.3333	12	18.3333	16	18.3333	18	17.3333	12.6667	11.6667	17
5	15	10	13	16.6667	12.3333	10.6667	11	14.6667	10.6667	9.66667	13.3333	12.6667	12.3333	17.6667	18	20.6667	16.6667	22.6667	19	13.6667	10.6667
6	9.33333	10	10	10.3333	11	10.3333	11.3333	15	12	6.33333	10.3333	9.66667
7	10	12.3333	9.66667	10.3333	9.33333	12	12.3333	12.6667	18	9.33333	10.6667	9	9	10.6667	12.6667	10	15.6667	10.3333	9.66667	9.66667	12.3333
8	9	9	10.6667	10.6667	12.3333	12.3333	10.6667	15	8	11.3333	9.33333	11.3333	10.6667	10	15.3333	15.6667	16.6667	11.6667	13.6667	10.6667	12
9	11.6667	9.33333	9	10.3333	10.3333	10.6667	10.6667	9	7.66667	9.66667	11	11	11.3333	14	15.3333	13.3333	12.6667	15.3333	14	11	13
10	12	10.6667	9.66667	12.6667	11.3333	12.6667	13.3333	12.6667	8.33333	10.3333	11.6667	10	12	13	13	12.6667	16.6667	16.3333	13.6667	12	12
11	9.33333	10.6667	11.3333	14.6667	14.6667	11	9.66667	10.3333	17.3333	16	21.3333	18.3333	17.6667	21.3333	25.3333	23.3333	19	27.6667	26	15.3333	14.3333
12	10.3333	8.33333	10	14	13	10.6667	11.3333	13	16.3333	9	13.6667	16.3333	18.3333	21	23.3333	20.3333	25.6667	29.3333	23	10.6667	19.6667
13	11	14.6667	10	13.3333	12.3333	11.3333	10.6667	12	17.3333	9.66667	14	16.3333	17.3333	23.3333	24	20.3333	14	28	23.3333	15.3333	20.3333
14	8.33333	12	10.3333	12	15.6667	13	12.6667	10.3333	14	15.3333	16	16.3333	17.6667	21.6667	22	28	21.3333	26	28	16.3333	16
15	14	14.6667	12.6667	13.3333	12.6667	9.66667	10.3333	12	11.6667	11	12.3333	10.3333	15.6667	17.6667	24.3333	22.6667	21	25.6667	22.6667	14.3333	13
16	10	10.3333	12	9.66667	9	10.3333	11.6667	9	16	13	11.6667	13.6667	12.6667	13	18	12	11.6667	19.6667	13.3333	11.6667	13
17	9.66667	12	12.6667	11	16	12.3333	12	11.6667	14	12.3333	12.6667	9.33333	11.6667	13	17.6667	14.3333	11.3333	14	13.6667	10.6667	11
18	15.6667	13.3333	10.6667	10.6667	13.3333	11.6667	11.3333	9.66667	15	8.66667	11.6667	10.6667	13.3333	14.6667	19	11.3333	15.3333	18	14.6667	8	13.3333
19	9	12.6667	10.3333	10	10	11.3333	15.6667	9.33333	11.6667	8.33333	10.6667	12.6667	9.66667	10.3333	18.6667	14.3333	16	21	17.6667	10	10.3333
20	15	12	9.66667	11	9.66667	10.3333	12	11.6667	10	10	8.33333	12.3333	9.66667	11.6667	13.3333	12.6667	15.6667	19.3333	11.6667	8.33333	11.3333
21	12.3333	9.66667	8.66667	11.3333	18.6667	11	10	13	14	10.6667	18	17.6667	14.6667	20	20.6667	20	24.6667	30	22.3333	25.6667	23
22	11.6667	10.3333	11.6667	15.6667	14.3333	11.3333	10.3333	10.6667	14.6667	14.3333	12.6667	18.6667	20.6667	20	22	23	23.6667	34.3333	19.6667	14.6667	12.6667
23	11.6667	9	9.66667	10.3333	13.6667	11.6667	10.6667	16	14.3333	19	17	21	15.6667	19.6667	22.6667	23	21	32	25.3333	19.6667	18.6667
24	11.3333	14	14	17	11.3333	12	10.3333	16	17.3333	18	34.3333	16.3333	16	20	21	24.3333	22	25.3333	23	11.3333	16.6667
25	9.33333	13.6667	12.3333	10.3333	10	12	10.6667	16	16	13.3333	14.6667	19.3333	15.3333	20	19.3333	20	25	20.3333	15.6667	14	20.3333
26	11	11.6667	8.33333	10	12.6667	12.6667	11	9.66667	13	11	11.6667	10.6667	10	16	16	12.6667	13.3333	21	14.6667	10.6667	13.3333
27	12.6667	12.3333	10.3333	9.33333	11.6667	12	13.3333	13	14.3333	8.66667	14.3333	9	13	14	17	14.3333	19.3333	19.6667	14.3333	10.3333	12.3333
28	13	12.6667	10	10.3333	10.6667	11	12	9.66667	10	14	12	10	9.33333	13.3333	11.3333	15	14.6667	18	14.3333	8.66667	17
29	11.3333	10.6667	9.66667	9.33333	10.3333	11.6667	11.3333	9.66667	13	12	10	8.33333	13.6667	11	14.6667	15	12.3333	17.6667	13.6667	9	11.6667
30	10.3333	13	10.3333	12.6667	12.6667	13.3333	11.3333	16	12.3333	11.6667	13	12.6667	11.6667	19.3333	14.6667	16	15.3333	22.3333	15.3333	11	11.3333
